# Supplementary material for: Optimization of pour-over coffee extraction variables using reinforcement learning
Source: PeerJ journal article supplement (doi:10.7717/peerj-cs.3219), 2025-10-10
Supplement: Dataset.xlsx [file Dataset.xlsx]

## Sheet: Sheet1
Barista Data				Level Roasting: Medium
Nama	Gender	Age	Experience	Grind Size	Brew Ratio	Brew Time	Temperature (℃)
Barista 1	M	22	> 1 Year(s)	Medium-Coarse	1:16	3m 30s	90
Barista 2	M	24	4 months	Fine-Medium	1:12	2m	86
Barista 3	M	19	< 1 Year(s)	Medium	1:16	3m	90
Barista 4	M	27	> 3 Year(s)	Fine-Medium	1:13	2m 25s	87
Barista 5	M	35	10 Year(s)	Medium-Coarse	1:16	3m 40s	91
Homebrewers 1	F	28	> 3 Year(s)	Medium	1:15	2m 45s	89
Homebrewers 2	M	26	> 3 Year(s)	Medium-Coarse	1:18	4m	92
Homebrewers 3	M	24	< 1 Year(s)	Fine-Medium	1:14	3m	88
Homebrewers 4	F	21	> 2 Year(s)	Medium-Coarse	1:17	3m 50s	92
Homebrewers 5	F	22	> 2 Year(s)	Medium	1:14	2m 30s	88
Level Roasting: Medium
Grind Size	Brew Ratio		Brew Time		Temperature (℃)
	Min	Max	Min	Max	Min	Max
Fine-Medium	1:12	1:14	2m	3m	86	88
Medium	1:14	1:16	2m 30s	3m	88	90
Medium-Coarse	1:16	1:18	3m 30s	4m	90	92
